# Supplementary material
Source: Springer Nature journal article supplement (https://www.springermedizin.de/resource/supplementary/12889_2012_6292_MOESM1_ESM.pdf/9499880)
Supplement: MOESM1 [file 9499880]

**THIRD-LEVEL****SECOND-LEVEL****FIRST-LEVEL****KEBELES****VILLAGES****HOUSEHOLDS****STRATA****Target****Study****Target****Study****Sampled****Low****Hobe****8****4****845****439****106****Bati Lej.****8****4****879****455****104****Mid-level****Sh. Bido****4****2****436****341****113****Dirama****3****1****523****271****123****HIGH****Yeteker****8****4****963****593****141****Wurib****3****1****1,090****354****152****TOTAL****6****34****16****4,736****2,453****739**
